# Supplementary material for: Cycling Empirical Antibiotic Therapy in Hospitals: Meta-Analysis and Models
Source: PLOS journal article supplement (doi:10.1371/journal.ppat.1004225), 2014-06-26

**Mixing, treatment frequency**

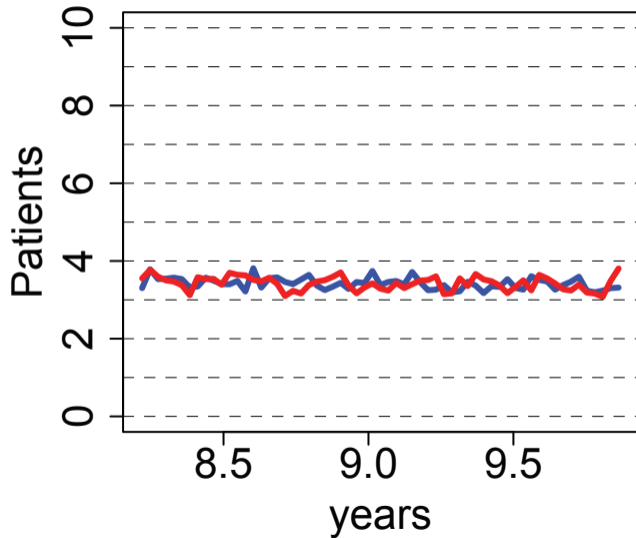

**Cycling, treatment frequency**

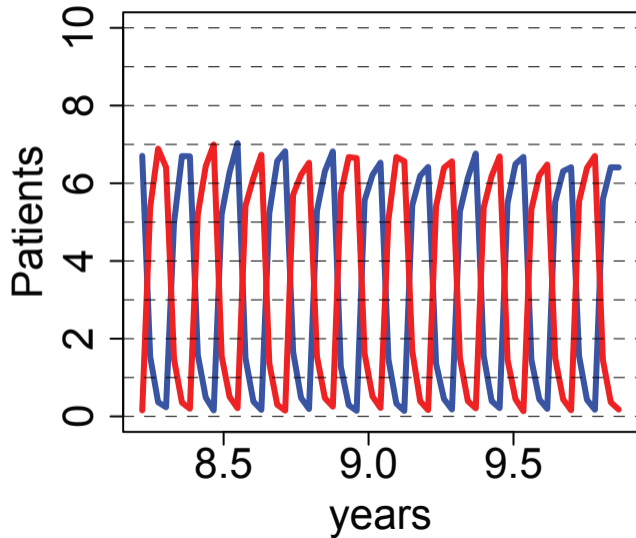

Supplement: S9 (10.1371/journal.ppat.1004225.s009) [file journal.ppat.1004225.s009]
