# Supplementary material for: Cycling Empirical Antibiotic Therapy in Hospitals: Meta-Analysis and Models
Source: PLOS journal article supplement (doi:10.1371/journal.ppat.1004225), 2014-06-26
Supplement: S15 (10.1371/journal.ppat.1004225.s015) [file journal.ppat.1004225.s015]

|           | Explanation                                                                                                                                                                                                                                                                                         | Screened range           | Default      |
|-----------|-----------------------------------------------------------------------------------------------------------------------------------------------------------------------------------------------------------------------------------------------------------------------------------------------------|--------------------------|--------------|
| $N$       | Number of beds                                                                                                                                                                                                                                                                                      | -                        | 20           |
| $t_{LOS}$ | Length of stay for asymptomatic patients [days]                                                                                                                                                                                                                                                     | 2, 5, 7, 10, 15, 20, 50  | 7 days*      |
| $r_I$     | Retention of infected patients (i.e. factor by which discharge of infected is more or less likely than for asymptomatic patients; low values indicate symptomatic infected are more likely to be removed, e.g. isolation; high values indicate symptomatic patients remain very likely in hospital) | 0.5, 1, 3, 5, 10, 20, 50 | 3**          |
| $t_e$     | Half-life of pathogens in reservoir [days]                                                                                                                                                                                                                                                          | 1, 2, 5, 10, 20, 30, 50  | 20 days [73] |
| $\chi$    | Rate of environmental contamination                                                                                                                                                                                                                                                                 | -                        | 0.1***       |

|              | Explanation                                                                                                                                             | Screened range             | Default                                                                                                                      |
|--------------|---------------------------------------------------------------------------------------------------------------------------------------------------------|----------------------------|------------------------------------------------------------------------------------------------------------------------------|
| $p_P$        | Proportion protecteds among incoming patients [%]                                                                                                       | 0, 15, 30, 45, 60, 75, 90  | 0%                                                                                                                           |
| $p_S$        | Proportion patients that are not fully protected by microflora [%]                                                                                      | 0, 20, 40, 60, 80, 95, 99  | 20%                                                                                                                          |
| $f_i$        | Proportion of incoming carriers that are symptomatic [%]                                                                                                | 0, 5, 20, 40, 60, 80, 100  | 5% (i.e. 0.25% of admitted patients symptomatic carriers)                                                                    |
| $f_{res}$    | Fraction of carriers (C +I) carrying strains resistant to either A, B or AB [%]                                                                         | 0, 10, 20, 40, 60, 80, 100 | scenario i: 0%<br>scenario ii and iii: 10%<br>(i.e. 2% of admitted patients are carriers of a resistant strain)[74]          |
| $p_{asym}$   | Asymmetry of A- and B-resistance among incoming patients (low values indicate all B- or AB-resistant; high values indicate all A- or AB- resistant) [%] | 0, 20, 40, 50, 60, 80, 100 | 50% (as many A- as B-resistant)                                                                                              |
| $f_{double}$ | Fraction double-resistance of all resistant strains (low values indicate only single-resistances; high values indicate only double-resistance) [%]      | 0, 20, 40, 50, 60, 80, 100 | scenario i and ii: 0%<br>scenario iii: 40%<br>(i.e. 0.8% of admitted patients are carriers of a double resistant strain)[74] |

|                            | Explanation                                                                                                                      | Screened range                                                  | Default                                                                                                                                                                                                                                  |
|----------------------------|----------------------------------------------------------------------------------------------------------------------------------|-----------------------------------------------------------------|------------------------------------------------------------------------------------------------------------------------------------------------------------------------------------------------------------------------------------------|
| $c_a$                      | cost of resistance A [%]                                                                                                         | 0, 10, 20, 30, 40, 50, 60                                       | 10% [75-77]                                                                                                                                                                                                                              |
| $c_b$                      | cost of resistance B [%]                                                                                                         | 0, 10, 20, 30, 40, 50, 60                                       | 10% [75-77]                                                                                                                                                                                                                              |
| $c_{ab}$                   | cost of resistance AB [%]                                                                                                        | 0, 10, 20, 30, 40, 50, 60                                       | 20% [75-77]                                                                                                                                                                                                                              |
| $t_{cl,P}$                 | Time until protection by microflora is gone when treated with broadspectrum                                                      | -                                                               | -                                                                                                                                                                                                                                        |
| $t_{cl}$                   | Time until carrier is not infectious when appropriately treated [days]                                                           | 1, 2, 5, 7, 10, 15, 20                                          | 5 days [78, 79]                                                                                                                                                                                                                          |
| $\mu_a$                    | Frequency of new A-resistance mutation per patient day                                                                           | $10^{-1}, 10^{-2}, 10^{-3}, 10^{-4}, 10^{-5}, 10^{-6}, 10^{-7}$ | $10^{-4}$ (both A and B equally likely)                                                                                                                                                                                                  |
| $\mu_a/\mu_b$              | Relative frequency of new B-resistance mutations per day                                                                         | $10^{-2}, 10^{-1}, 1, 10, 10^2, 10^4, 10^6$                     | 1 (both A and B equally likely)                                                                                                                                                                                                          |
| $\mu_{ab}/(\mu_a * \mu_b)$ | Relative frequency of new AB-resistance mutations per day                                                                        | $10^{-3}, 10^{-2}, 10^{-1}, 1, 10, 10^2, 10^3$                  | 1 (both A and B mutations independent)                                                                                                                                                                                                   |
| $d$                        | Time to death if untreated [days]                                                                                                | 2, 5, 10, 20, 30, 50, 100                                       | 7 days                                                                                                                                                                                                                                   |
| $t_P$                      | Time to progression from colonized to infected [days]                                                                            | 1, 5, 7, 10, 20, 50, never                                      | 7 days (this corresponds to ~8% of patients acquiring an infection in the hospital, which is global average) [1]                                                                                                                         |
| $\beta_D$                  | Infectious encounters between patients resulting in colonization per patient day (calculated for 20 beds)                        | 0.005, 0.01, 0.015, 0.02, 0.025, 0.03, 0.035                    | 0.02 [22, 23] ( $R_0$ of wild-type $\approx 1.5$ , $R_A$ , the number of secondary infections in a hospital is $\sim 0.4$ , because we assume that there is no superinfection and hence only a fraction of the patients is susceptible)* |
| $\beta_E/\beta_D$          | Infectious encounters with environment resulting in coloni-zation per patient day (calculated for 20 beds) relative to $\beta_D$ | 0, 0.17, 0.33, 0.50, 0.67, 0.83, 1                              | Equivalent to $\beta_D/t_e\chi$ (adjusted such that for any given environmental decay rate $t_e$ , $R_0$ of environmental transmission is equal to the $R_0$ for direct transmission in the same scenario)                               |

|            | Explanation                                                                                                                                                                                                                                           | Screened range                         | Default |
|------------|-------------------------------------------------------------------------------------------------------------------------------------------------------------------------------------------------------------------------------------------------------|----------------------------------------|---------|
| $t_s$      | Rate with which inappropriate treatment of infected patients is switched from A to B or B to A. This is not the same as colonized patients progressing to symptomatic disease, in which case we always assume that treatment is switched within a day | never, 0.17, 0.33, 0.50, 0.67, 0.83, 1 | never   |
| $f_P$      | fraction of asymptomatic patients receiving scheduled treatment for prophylaxis or treatment of other disease [%]                                                                                                                                     | 0, 5, 10, 15, 20, 30, 40               | 20%     |
| $f_{p,AB}$ | fraction of asymptomatic patients additionally receiving both drug A and B for prophylaxis or treatment of other disease [%]                                                                                                                          | 0, 1, 5, 10, 20, 50, 100               | 1%      |
